# Supplementary material
Source: ML conference proceedings conference paper supplement (https://openaccess.thecvf.com/content/ICCV2023/html/Zhou_SparseMAE_Sparse_Training_ICCV_2023_paper.html)
Supplement: Supplementary file 1 [file Zhou_SparseMAE_Sparse_Training_ICCV_2023_supplemental.pdf]

# SparseMAE: Sparse Training Meets Masked Autoencoders

Aojun Zhou<sup>1</sup> Yang Li<sup>2</sup> Zipeng Qin<sup>1</sup> Jianbo Liu<sup>1</sup> Junting Pan<sup>1</sup>  
Renrui Zhang<sup>13</sup> Rui Zhao<sup>2</sup> Peng Gao<sup>3</sup> Hongsheng Li<sup>1</sup>  
<sup>1</sup>The Chinese University of Hong Kong  
<sup>2</sup>SenseTime Research <sup>3</sup>Shanghai AI Lab

## Appendix

### A. Hyper-parameters

**Hyper-parameters of ImageNet-1K Pretraining.** See Tab 1.

**Hyper-parameters of ImageNet-1K Image Classification Finetuning.** See Tab 2. We fine-tune SparseMAE-T/S for 200 epochs following TinyMIM and G2SD on ImageNet-1K.

**Hyper-parameters for ADE20K Semantic Segmentation Finetuning.** See Tab 3.

Table 1: Hyper-parameters of ImageNet-1K pretraining.

| Hyperparameter         | SparseMAE-T         | -S   |
|------------------------|---------------------|------|
| Layers                 | 12                  |      |
| Mask ratio             | 25%                 | 25%  |
| Sparse pattern         | 2:32                | 4:32 |
| Patch size             | 16 × 16             |      |
| Pre-training epochs    | 400                 |      |
| Batch size             | 4096                |      |
| Adam $\epsilon$        | 1e-8                |      |
| Adam $\beta$           | (0.9, 0.999)        |      |
| Peak learning rate     | 2.4e-3              |      |
| Minimal learning rate  | 1e-5                |      |
| Learning rate schedule | Cosine              |      |
| Warmup epochs          | 5/15                |      |
| Stochastic depth       | 0.1                 |      |
| Dropout                | ✗                   |      |
| Weight decay           | 0.05                |      |
| Data augment           | RandomResizeAndCrop |      |
| Input resolution       | 224 × 224           |      |

Table 2: Hyper-parameters of ImageNet-1K image classification finetuning.

| Hyperparameter                 | SparseMAE-T -S |
|--------------------------------|----------------|
| Peak learning rate             | 5e-3           |
| Fine-tuning epochs             | 200            |
| Warmup epochs                  | 5              |
| Layer-wise learning rate decay | 0.65           |
| Batch size                     | 2048           |
| Adam $\epsilon$                | 1e-8           |
| Adam $\beta$                   | (0.9, 0.999)   |
| Minimal learning rate          | 1e-6           |
| Learning rate schedule         | Cosine         |
| Stochastic depth               | 0.1            |
| Weight decay                   | 0.05           |
| Label smoothing $\epsilon$     | 0.1            |
| Dropout                        | ✗              |
| Gradient clipping              | ✗              |
| Erasing                        | 0.25           |
| Input resolution               | 224 × 224      |
| Rand augment                   | 9/0.5          |
| Mixup                          | 0.8            |
| Cutmix                         | 1.0            |

Table 3: Hyper-parameters of ADE20K semantic segmentation finetuning.

| <b>Hyperparameter</b>          | <b>SparseMAE-T</b> <b>SparseMAE-S</b> |
|--------------------------------|---------------------------------------|
| Input resolution               | $512 \times 512$                      |
| Peak learning rate             | 1e-4                                  |
| Fine-tuning steps              | 160K                                  |
| Batch size                     | 16                                    |
| Adam $\epsilon$                | 1e-8                                  |
| Adam $\beta$                   | (0.9, 0.999)                          |
| Layer-wise learning rate decay | {0.65, 0.75, 0.8}                     |
| Minimal learning rate          | 0                                     |
| Learning rate schedule         | Linear                                |
| Warmup steps                   | 1500                                  |
| Dropout                        | $\times$                              |
| Stochastic depth               | 0.1                                   |
| Weight decay                   | 0.05                                  |
